# Supplementary material for: Distinctive Biological Properties between Mesenchymal Stem Cell Spheroids and Clumps of Mesenchymal Stem Cells/Extracellular Matrix Complexes in 3D Culture Systems
Source: MDPI journal article supplement (doi:10.3390/app132312790), 2023-11-29
Supplement: s1 [file s1]

Archive with 1 entries (1 files):
- applsci-2699287-supplementary.pdf
