# Supplementary material for: Distinctive Biological Properties between Mesenchymal Stem Cell Spheroids and Clumps of Mesenchymal Stem Cells/Extracellular Matrix Complexes in 3D Culture Systems
Source: MDPI journal article supplement (doi:10.3390/app132312790), 2023-11-29
Supplement: s1 [file s1 › applsci-2699287-supplementary.pdf]

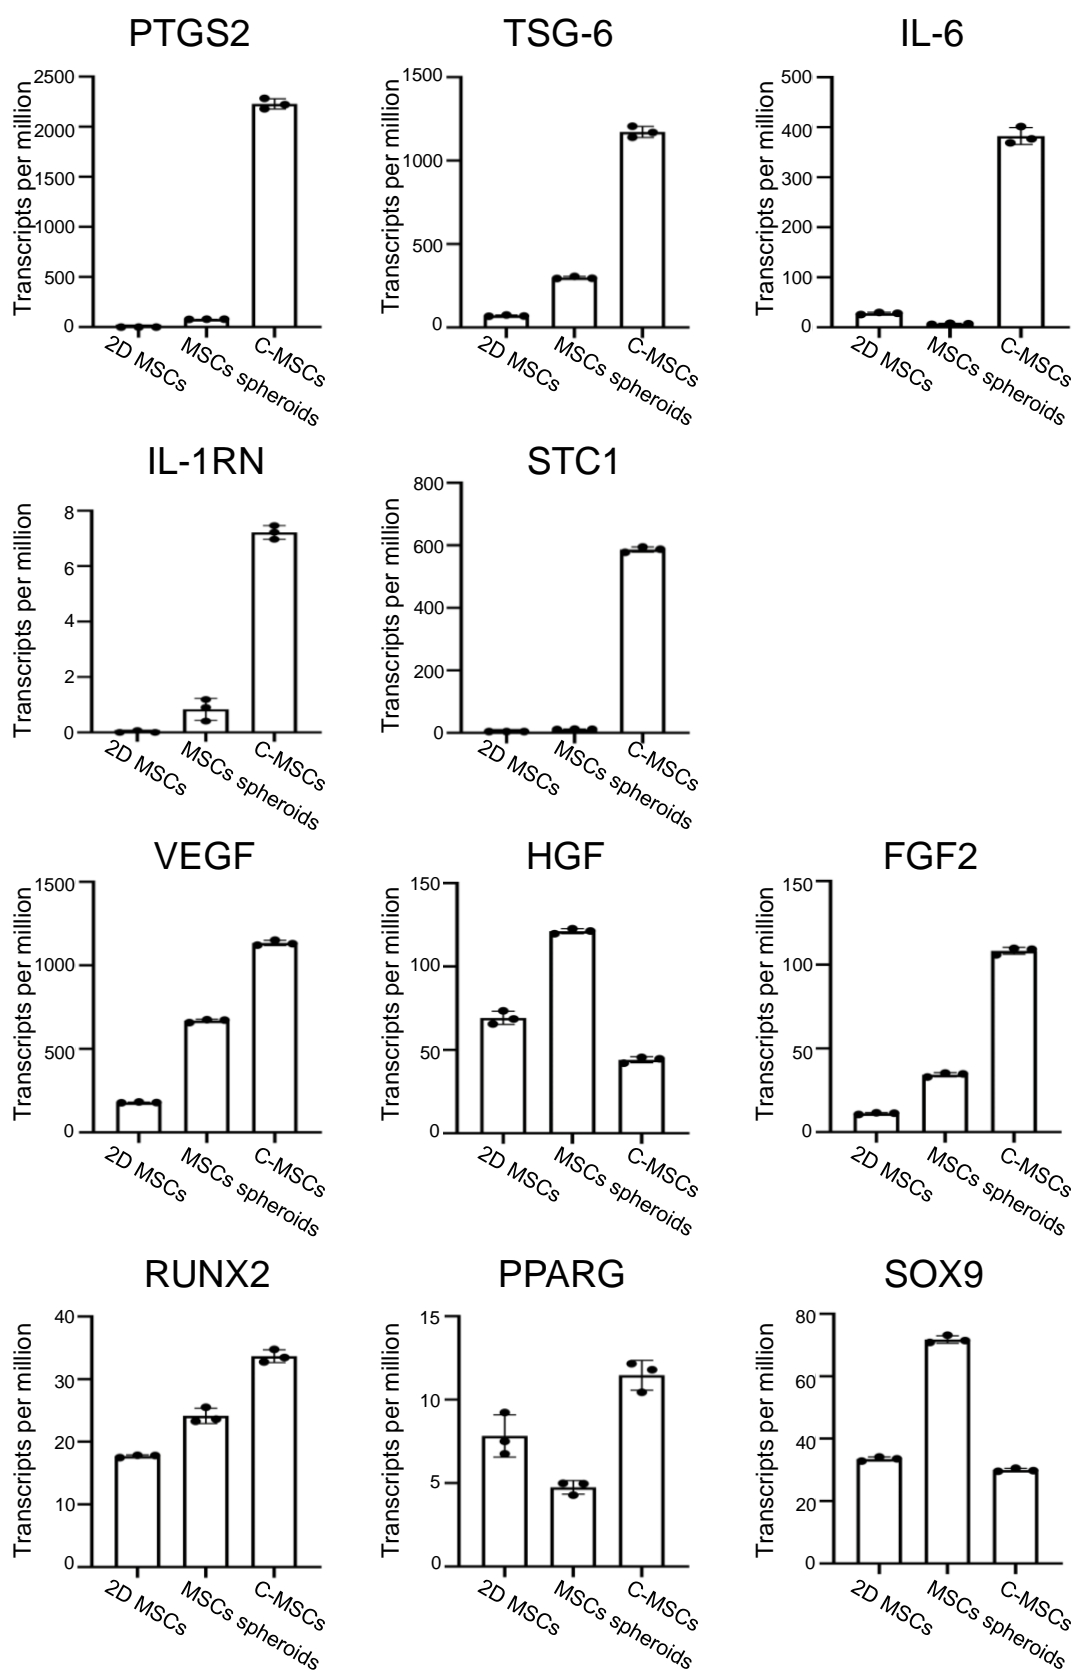

**Supplementary Figure S1. RNA expression patterns quantified using TPM in RNA-seq.**

Total RNA was extracted from three distinct cell culture groups: (1) 2D cultures in 24-well plates seeded at  $2.0 \times 10^5$  cells/well ( $n=3$ ), (2) a set of eight MSC spheroids, each consisting of  $2.5 \times 10^4$  cells ( $n=3$ ), and (3) a single C-MSCs formed from  $2.0 \times 10^5$  cells ( $n=3$ ). Then, RNA-seq analysis was performed to assess the expression levels of immunomodulatory factors, cytoprotective factors, and trilineage-related genes. Expression levels of mRNA were quantified as TPM. Values represent means  $\pm$  S.D. of three culture.

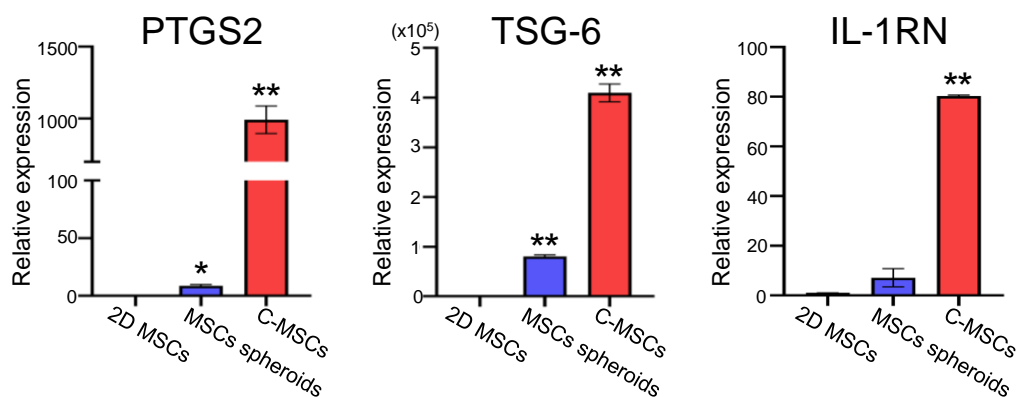

### Supplementary Figure S2. Validation of RNA-seq analysis by qPCR.

Total RNA was extracted from three distinct cell culture groups: (1) 2D cultures in 24-well plates seeded at  $2.0 \times 10^5$  cells/well (n=3), (2) a set of eight MSC spheroids, each consisting of  $2.5 \times 10^4$  cells (n=3), and (3) a single C-MSCs formed from  $2.0 \times 10^5$  cells (n=3). The mRNA expression levels of PTGS2, TSG-6, or IL-1RN were quantified using real-time PCR with  $\Delta\Delta C_t$  method and 18S rRNA as a reference control. Data were normalized to the values of 2D MSCs. Values represent means  $\pm$  S.D. of three cultures. Significant differences compared with 2D MSCs are indicated: \* $p < 0.05$ , \*\* $p < 0.01$  (ANOVA).

## TWIST

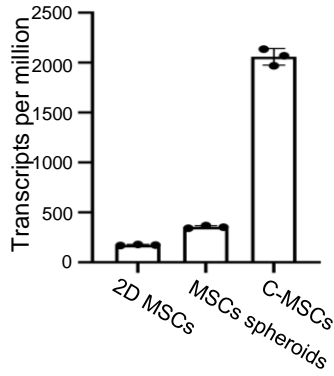

## SNAIL

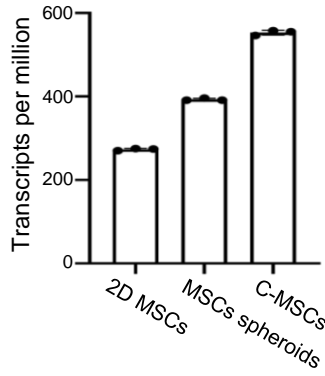

## CD44

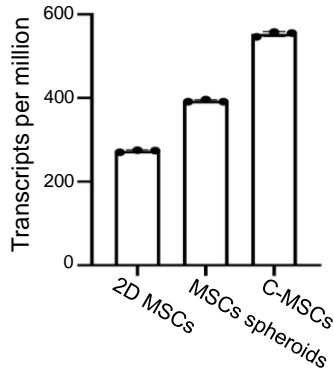

## CD133

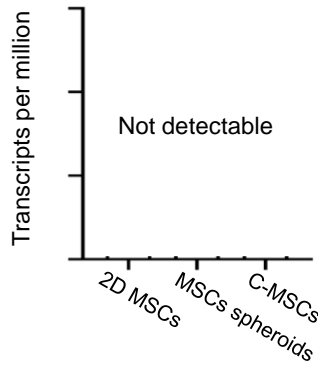

## LAMC2

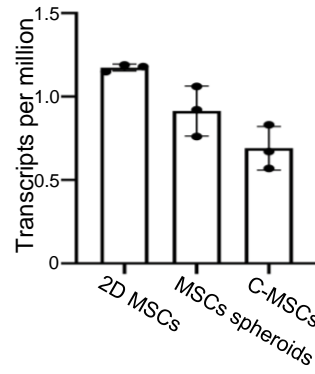

## SMAD2

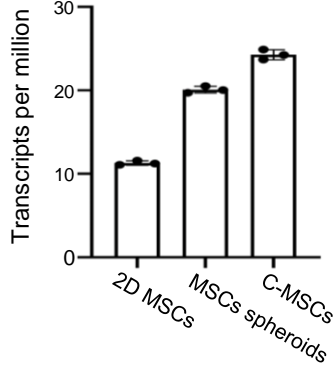

## SMAD4

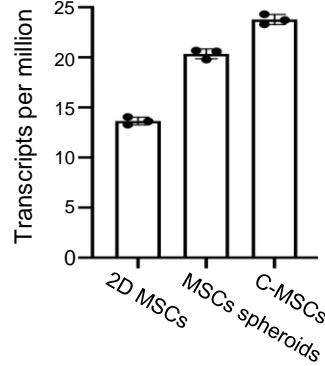

## MMP2

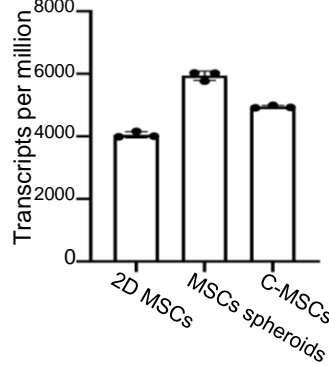

## MMP10

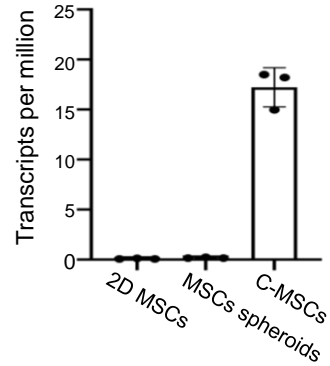

### Supplementary Figure S3. RNA-seq analysis to assess the expression levels of ECM-related transcription factors, cancer stem cell biomarkers, and TGF- $\beta$ signaling-related genes.

Total RNA was extracted from three distinct cell culture groups: (1) 2D cultures in 24-well plates seeded at  $2.0 \times 10^5$  cells/well ( $n=3$ ), (2) a set of eight MSC spheroids, each consisting of  $2.5 \times 10^4$  cells ( $n=3$ ), and (3) a single C-MSCs formed from  $2.0 \times 10^5$  cells ( $n=3$ ). Then, RNA-seq analysis was performed to assess the expression levels of ECM-related transcription factors, cancer stem cells biomarkers, and TGF- $\beta$  signaling-related genes. Expression levels of mRNA were quantified as TPM. Values represent means  $\pm$  S.D. of three culture.

**Supplementary Table S1. Sense and antisense primers for qPCR**

| <i>Target gene</i> |         | <i>Primer sequence</i>           |
|--------------------|---------|----------------------------------|
| PTGS2              | Forward | 5'- TGCATTCTTTGCCCAGCACT -3'     |
|                    | Reverse | 5'- AAAGGCGCAGTTTACGCTGT-3'      |
| IL-1RN             | Forward | 5'- TTCCTGTTCCATTCAGAGACG-3'     |
|                    | Reverse | 5'- CTTCTGGTTAACATCCCAGATTC-3'   |
| TNFAIP6            | Forward | 5'- AAGCACGGTCTGGCAAATACAAGC -3' |
|                    | Reverse | 5'- ATCCATCCAGCAGCACAGACATGA -3' |
| 18S                | Forward | 5'- GTAACCCGTTGAACCCCAT -3'      |
|                    | Reverse | 5'- CCATCCAATCGGTAGTAGCG -3'     |
